# Supplementary material
Source: publisher figshare collection journal article supplement (https://gsajournals.figshare.com/ndownloader/files/26183621)
Supplement: Supplementary file 1 [file 26183621]

**
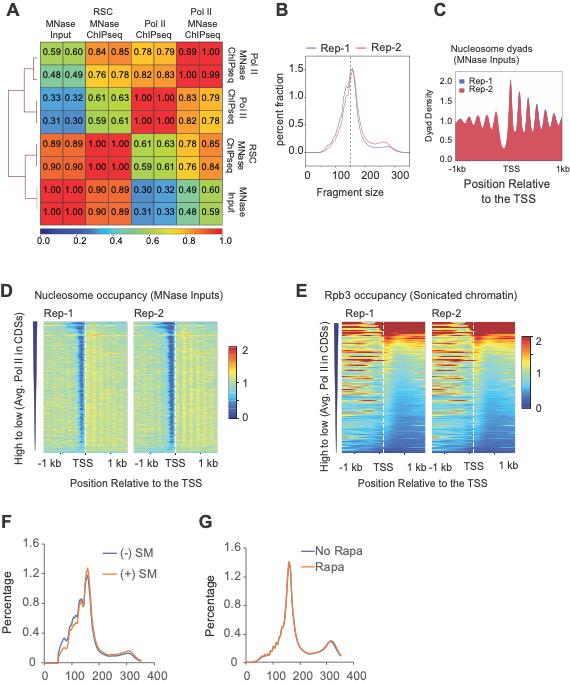
**

**Figure S1: MNase-seq and Pol II ChIP-seq in WT cell.**

A) Heatmap showing Pearson correlations for the replicates of Pol II MNase ChIP-seq, RSC MNase ChIP-seq, Pol II ChIP-seq, and MNase-seq inputs.

B-E) Fragment length distribution (B), heatmaps showing nucleosome dyads (C) and occupancies (D) of MNase-digested chromatin from two biological replicates (Rep1 and Rep2). The dyads, nucleosome occupancies are plotted around the transcription start sites (TSS; +/- 1 kb).

E) Heatmap depicting Pol II occupancies, which were determined by ChIP-seq for Rpb3 using sonicated chromatin (n=5746). The genes were sorted based on the average Pol II (Rpb3) occupancies in the coding sequences.

F-G) Fragment histogram for the MNase-seq data from previous studies (Rawal *et al.* 2018) (F) and (Kubik *et al.* 2018) (G). The cells were treated by sulfometuron methyl (SM) to elicit amino acid starvation and induce Gcn4 targets (F), and cell were treated with rapamycin to shuttle Sth1 from nucleus to cytoplasm in *STH1* anchor away cells (G).

**Figure S2: RSC and Pol II are enrichment in CDSs .**

A) Metagene profile showing occupancies of nucleosomes (MNase inputs), RSC and Rpb3 occupancies normalized to nucleosome occupancies for the ribosomal protein genes.

C) 5746 genes were sorted by decreasing Pol II occupancy and grouped in deciles. Average occupancy of RSC in CDSs for each decile is shown.

**Figure S3: RSC associates with both full-length and shorter MPDFs.**

A and B): Heatmaps depicting 2D occupancies of MPDF distribution around the TSS, with MPDFs shown on the Y-axis. Heatmaps for the MPDFs from nucleosomes (MNase-seq) (A) and RSC-bound nucleosomes (B) at the bottom 10% Pol II-occupied genes, the top 10% Pol II-occupied genes, and ribosomal protein genes (RPGs) are shown.

(C-D) Metagene profiles depicting the relative coverage of MPDF lengths of the RSC-bound nucleosome vs total nucleosomes for the Pol II-B10 (C) and Pol II-T10 (D) are shown.

**Figure S4: RSC promotes transcription of highly expressed genes.**

A-D) Genome-browser shots are shown for representative genes showing increased Pol II occupancies in CDSs in Sth1 anchor-away cells. TBP and Pol II occupancies in untreated and rapamycin-treated (Rapa) are shown for a few representative genes showing higher Pol II occupancies in Sth1 anchor away cells. Arrows denote 5’ to 3’ direction of the indicated genes. Biological replicates are shown.

**Table S1: Strains used in this Study**

| **Name** | **Parent** | **Genotype** | **Reference** |
| --- | --- | --- | --- |
| CGY 2 | BY4741 | *MATa his3Δ1 leu2Δ0 met15Δ0 ura3Δ0 STH1-myc13::HIS3* | This study |
| F729 | BY4741 | *MATa his3Δ1 leu2Δ0 met15Δ0 ura3Δ0* | Research Genetics |
| YPE468 | W303 | *MATa ade2-1can1-100his3-11,15leu2-3,112trp1-1ura3-1RAD5+rsc8::KanMX-GALp-HA3-RSC8* | (Ocampo *et al.* 2019) |
| YSK111 | W303 | *matα or1-1 fpr1::NAT RPL13A-2XFKB12::TRP1 STH1-FRB-KanMX* | (Kubik *et al.* 2018) |
| HHY154 | W303 | *matα tor1-1 fpr1::NAT RPL13A-2XFKB12::TRP1 SPT15-FRB-KanMX* | (Haruki *et al.* 2008) |
| NF198 | BY4742 | *matα his3-Δ200, leu2-3,2-112, lys2-801, trp1-1(am), URA3::TIR-9Myc, STH1-44AID9Flag::hphNT* | (Klein-Brill *et al.* 2019) |
| KHW76 | W303 | MATalpha, tor1-1, fpr1::NAT, RPL13TAB-2Px (FSKpBt1152): | (Petrenko *et al.* 2019) |

1. Haruki, H., J. Nishikawa and U. K. Laemmli, 2008 The anchor-away technique: rapid, conditional establishment of yeast mutant phenotypes. Mol Cell 31**:** 925-932.
2. Klein-Brill, A., D. Joseph-Strauss, A. Appleboim and N. Friedman, 2019 Dynamics of Chromatin and Transcription during Transient Depletion of the RSC Chromatin Remodeling Complex. Cell Rep 26**:** 279-292.e275.
3. Kubik, S., E. O'Duibhir, W. J. de Jonge, S. Mattarocci, B. Albert *et al.*, 2018 Sequence-Directed Action of RSC Remodeler and General Regulatory Factors Modulates +1 Nucleosome Position to Facilitate Transcription. Mol Cell 71**:** 89-102 e105.
4. Ocampo, J., R. V. Chereji, P. R. Eriksson and D. J. Clark, 2019 Contrasting roles of the RSC and ISW1/CHD1 chromatin remodelers in RNA polymerase II elongation and termination. Genome Res 29**:** 407-417.
5. Petrenko, N., Y. Jin, L. Dong, K. H. Wong and K. Struhl, 2019 Requirements for RNA polymerase II preinitiation complex formation in vivo. Elife 8.
6. Rawal, Y., R. V. Chereji, H. Qiu, S. Ananthakrishnan, C. K. Govind *et al.*, 2018 SWI/SNF and RSC cooperate to reposition and evict promoter nucleosomes at highly expressed genes in yeast. Genes Dev 32**:** 695-710.
